# Supplementary material
Source: Springer Nature journal article supplement (https://www.springermedizin.de/resource/supplementary/13223_2014_525_MOESM2_ESM.pdf/9596726)

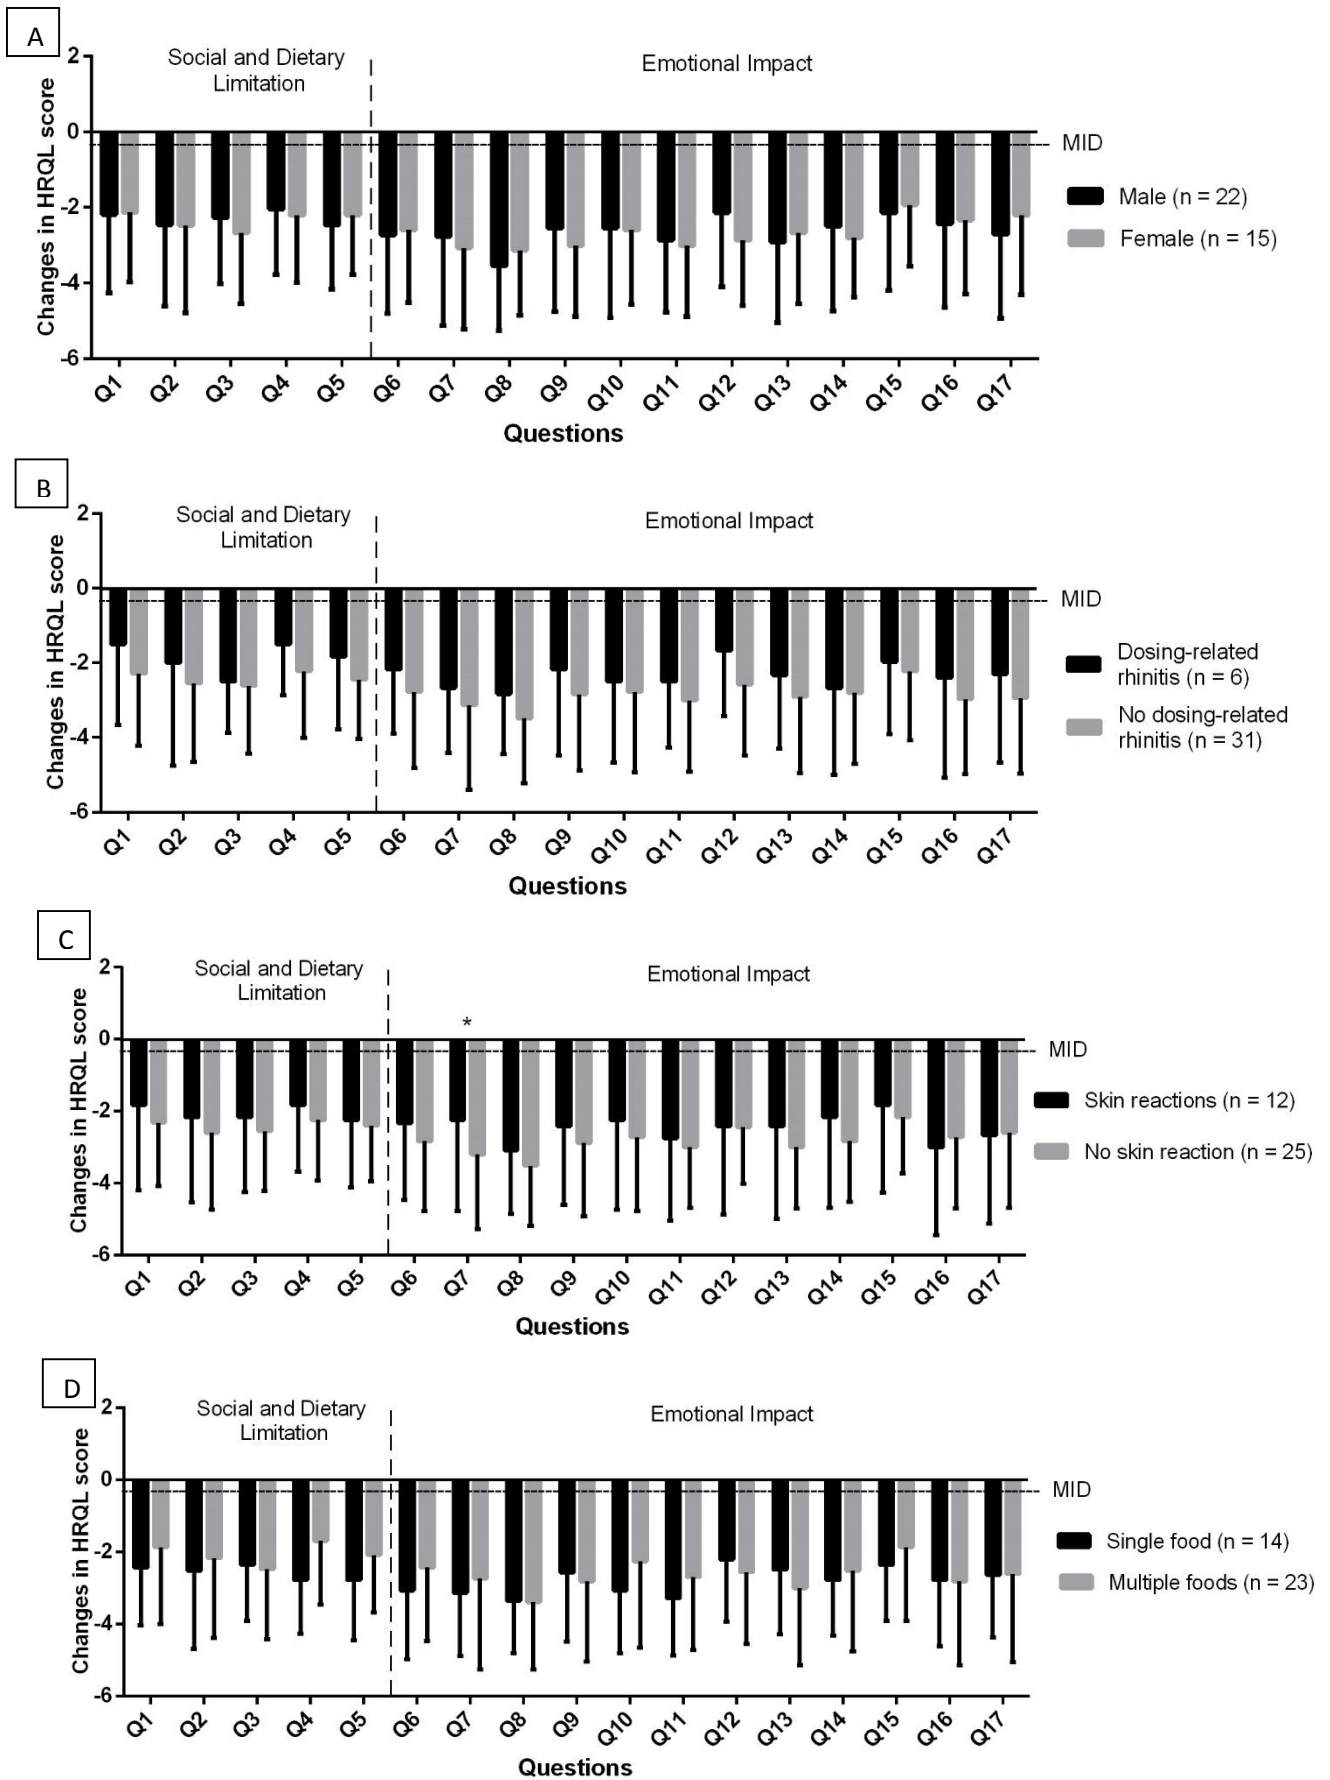

F

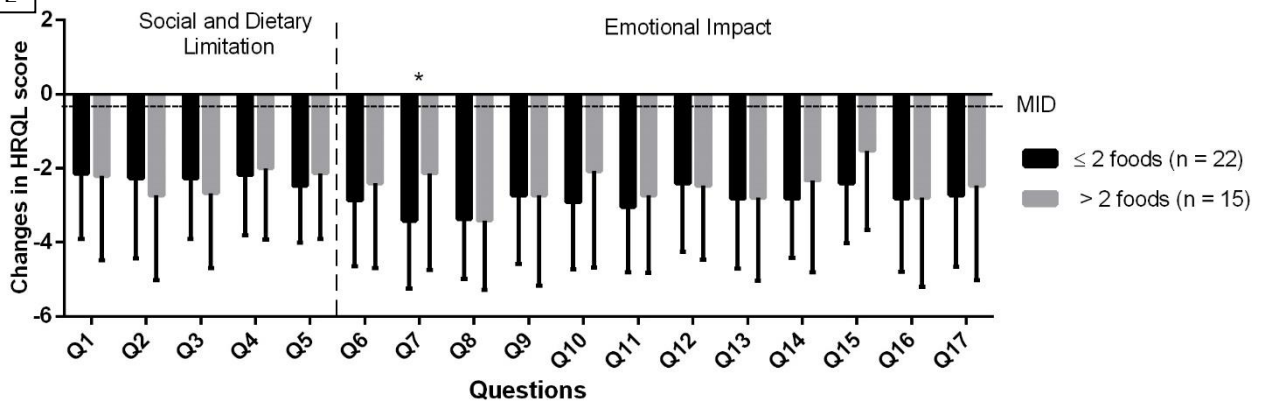

Supplement: MOESM2 [file 9596726]
